# Supplementary material for: Taxonomic Identification and Molecular DNA Barcoding of Collected Wild-Growing Orchids Used Traditionally for Salep Production
Source: MDPI journal article supplement (doi:10.3390/plants12173038), 2023-08-24
Supplement: s1 [file s1]

**Supplementary Table S1.** Collection information for different Greek wild-growing species of salep orchids (Orchidaceae) assigned with International Plant Exchange Network (IPEN) accession numbers and combined taxonomic and/ or molecular identification based on analysis of morphological data and BLAST tool results, respectively.

| Collection information of Greek wild-growing species of Orchidaceae |                   |                                                  |           |                  |                  | Species composition based on taxonomic identification combined with molecular barcoding data |                                                                          |                                                 |
|---------------------------------------------------------------------|-------------------|--------------------------------------------------|-----------|------------------|------------------|----------------------------------------------------------------------------------------------|--------------------------------------------------------------------------|-------------------------------------------------|
| Serial No.                                                          | IPEN number       | Collection area                                  | Date      | Latitude (North) | Longitude (East) | Taxonomic identification                                                                     | Blast-based identification/<br>Molecular barcoding<br>ITS/matK/psbA-trnH | Consensus                                       |
| 1                                                                   | BBGK-1-18,6097 -1 | Mountain areas of Kozani, West Macedonia, Greece | June 2018 | 40.300581        | 21.789813        | <i>Dactylorhiza</i> sp.                                                                      | <i>Dactylorhiza</i> sp.                                                  | <i>Dactylorhiza</i> sp.                         |
| 2                                                                   | BBGK-1-18,6097 -2 | Mountain areas of Kozani, West Macedonia, Greece | June 2018 | 40.300581        | 21.789813        | <i>Dactylorhiza sambucina</i>                                                                | <i>Dactylorhiza</i> sp.<br>( <i>D. sambucina</i> / <i>D. viridis</i> )   | <i>Dactylorhiza sambucina</i>                   |
| 3                                                                   | BBGK-1-18,6097 -3 | Mountain areas of Kozani, West Macedonia, Greece | June 2018 | 40.300581        | 21.789813        | <i>Anacamptis</i> sp.                                                                        | <i>Anacamptis</i> sp.                                                    | <i>Anacamptis</i> sp.                           |
| 4                                                                   | BBGK-1-18,6097 -4 | Mountain areas of Kozani, West Macedonia, Greece | June 2018 | 40.300581        | 21.789813        | <i>Anacamptis morio</i> subsp. <i>caucasica</i>                                              | <i>Anacamptis</i> sp.<br>( <i>A. morio</i> )                             | <i>Anacamptis morio</i> subsp. <i>caucasica</i> |
| 5                                                                   | BBGK-1-18,6097 -5 | Mountain areas of Kozani, West Macedonia, Greece | June 2018 | 40.300581        | 21.789813        | <i>Anacamptis morio</i> subsp. <i>caucasica</i>                                              | <i>Anacamptis</i> sp.                                                    | <i>Anacamptis morio</i> subsp. <i>caucasica</i> |
| 6                                                                   | BBGK-1-18,6097 -6 | Mountain areas of Kozani, West Macedonia, Greece | June 2018 | 40.300581        | 21.789813        | <i>Anacamptis morio</i> subsp. <i>caucasica</i>                                              | <i>Anacamptis morio</i>                                                  | <i>Anacamptis morio</i> subsp. <i>caucasica</i> |
| 7                                                                   | BBGK-1-18,6097 -7 | Mountain areas of Kozani, West Macedonia, Greece | June 2018 | 40.300581        | 21.789813        | <i>Dactylorhiza sambucina</i>                                                                | <i>Dactylorhiza</i> sp.                                                  | <i>Dactylorhiza sambucina</i>                   |

|    |                    |                                                  |           |           |           |                                                 |                                           |                                                 |
|----|--------------------|--------------------------------------------------|-----------|-----------|-----------|-------------------------------------------------|-------------------------------------------|-------------------------------------------------|
| 8  | BBGK-1-18,6097 -8  | Mountain areas of Kozani, West Macedonia, Greece | June 2018 | 40.300581 | 21.789813 | <i>Anacamptis morio</i> subsp. <i>caucasica</i> | <i>Anacamptis</i> sp. ( <i>A. morio</i> ) | <i>Anacamptis morio</i> subsp. <i>caucasica</i> |
| 9  | BBGK-1-18,6097 -9  | Mountain areas of Kozani, West Macedonia, Greece | June 2018 | 40.300581 | 21.789813 | <i>Dactylorhiza</i> sp.                         | <i>Dactylorhiza</i> sp.                   | <i>Dactylorhiza</i> sp.                         |
| 10 | BBGK-1-18,6097 -10 | Mountain areas of Kozani, West Macedonia, Greece | June 2018 | 40.300581 | 21.789813 | <i>Dactylorhiza sambucina</i>                   | <i>Dactylorhiza sambucina</i>             | <i>Dactylorhiza sambucina</i>                   |
| 11 | BBGK-1-18,6097 -11 | Mountain areas of Kozani, West Macedonia, Greece | June 2018 | 40.300581 | 21.789813 | <i>Anacamptis morio</i> subsp. <i>caucasica</i> | <i>Anacamptis morio</i>                   | <i>Anacamptis morio</i> subsp. <i>caucasica</i> |
| 12 | BBGK-1-18,6097 -12 | Mountain areas of Kozani, West Macedonia, Greece | June 2018 | 40.300581 | 21.789813 | <i>Anacamptis morio</i> subsp. <i>caucasica</i> | <i>Anacamptis</i> sp. ( <i>A. morio</i> ) | <i>Anacamptis morio</i> subsp. <i>caucasica</i> |
| 13 | BBGK-1-18,6097 -13 | Mountain areas of Kozani, West Macedonia, Greece | June 2018 | 40.300581 | 21.789813 | <i>Anacamptis morio</i> subsp. <i>caucasica</i> | <i>Anacamptis</i> sp. ( <i>A. morio</i> ) | <i>Anacamptis morio</i> subsp. <i>caucasica</i> |
| 14 | BBGK-1-18,6097 -14 | Mountain areas of Kozani, West Macedonia, Greece | June 2018 | 40.300581 | 21.789813 | <i>Anacamptis morio</i> subsp. <i>caucasica</i> | <i>Anacamptis morio</i>                   | <i>Anacamptis morio</i> subsp. <i>caucasica</i> |
| 15 | BBGK-1-18,6097 -15 | Mountain areas of Kozani, West Macedonia, Greece | June 2018 | 40.300581 | 21.789813 | <i>Anacamptis morio</i> subsp. <i>caucasica</i> | <i>Anacamptis</i> sp.                     | <i>Anacamptis</i> subsp. <i>caucasica</i>       |
| 16 | BBGK-1-18,6067 -16 | Mountain areas of Kozani, West Macedonia, Greece | June 2018 | 40.300581 | 21.789813 | <i>Anacamptis morio</i> subsp. <i>caucasica</i> | <i>Anacamptis</i> sp. ( <i>A. morio</i> ) | <i>Anacamptis morio</i> subsp. <i>caucasica</i> |
| 17 | BBGK-1-18,6097 -17 | Mountain areas of Kozani, West Macedonia, Greece | June 2018 | 40.300581 | 21.789813 | <i>Anacamptis morio</i> subsp. <i>caucasica</i> | <i>Anacamptis morio</i>                   | <i>Anacamptis morio</i> subsp. <i>caucasica</i> |

|    |                     |                                                  |           |           |           |                                                 |                                                                      |                                                              |
|----|---------------------|--------------------------------------------------|-----------|-----------|-----------|-------------------------------------------------|----------------------------------------------------------------------|--------------------------------------------------------------|
| 18 | BBGK-1-18,6097 -18  | Mountain areas of Kozani, West Macedonia, Greece | June 2018 | 40.300581 | 21.789813 | <i>Dactylorhiza</i> sp. ( <i>D. sambucina</i> ) | <i>Dactylorhiza</i> sp. ( <i>D. sambucina</i> / <i>D. viridis</i> )  | <i>Dactylorhiza. sambucina</i>                               |
| 19 | BBGK-1-18,6097 -19  | Mountain areas of Kozani, West Macedonia, Greece | June 2018 | 40.300581 | 21.789813 | <i>Anacamptis morio</i> subsp. <i>caucasica</i> | <i>Anacamptis morio</i>                                              | <i>Anacamptis morio</i> subsp. <i>caucasica</i>              |
| 20 | BBGK-1-18,6097 -20  | Mountain areas of Kozani, West Macedonia, Greece | June 2018 | 40.300581 | 21.789813 | <i>Dactylorhiza</i> sp.                         | <i>Dactylorhiza</i> sp.                                              | <i>Dactylorhiza</i> sp.                                      |
| 21 | BBGK-1-18,6097 -21  | Mountain areas of Kozani, West Macedonia, Greece | June 2018 | 40.300581 | 21.789813 | <i>Anacamptis morio</i> subsp. <i>caucasica</i> | <i>Anacamptis morio</i>                                              | <i>Anacamptis morio</i> subsp. <i>caucasica</i>              |
| 22 | BBGK-1-18,6097 -22  | Mountain areas of Kozani, West Macedonia, Greece | June 2018 | 40.300581 | 21.789813 | <i>Anacamptis morio</i> subsp. <i>caucasica</i> | <i>Anacamptis</i> sp. ( <i>A. Morio</i> )                            | <i>Anacamptis morio</i> subsp. <i>caucasica</i>              |
| 23 | BBGK-1-18,6097 -23A | Mountain areas of Kozani, West Macedonia, Greece | June 2018 | 40.300581 | 21.789813 | <i>Dactylorhiza sambucina</i>                   | <i>Dactylorhiza sambucina</i>                                        | <i>Dactylorhiza sambucina</i>                                |
| 24 | BBGK-1-18,6097 -23B | Mountain areas of Kozani, West Macedonia, Greece | June 2018 | 40.300581 | 21.789813 | <i>Dactylorhiza sambucina</i>                   | <i>Dactylorhiza sambucina</i>                                        | <i>Dactylorhiza sambucina</i>                                |
| 25 | BBGK-1-18,6097 -24  | Mountain areas of Kozani, West Macedonia, Greece | June 2018 | 40.300581 | 21.789813 | <i>Dactylorhiza sambucina</i>                   | <i>Dactylorhiza sambucina</i> / <i>D. incarnata</i>                  | <i>Dactylorhiza</i> sp. ( <i>D. sambucina</i> )              |
| 26 | BBGK-1-18,6097 -26  | Mountain areas of Kozani, West Macedonia, Greece | June 2018 | 40.300581 | 21.789813 | -                                               | <i>Dactylorhiza</i> sp. ( <i>D. maculata</i> / <i>D. sambucina</i> ) | <i>Dactylorhiza maculata</i> / <i>Dactylorhiza sambucina</i> |
| 27 | BBGK-1-18,6097 -27  | Mountain areas of Kozani, West Macedonia, Greece | June 2018 | 40.300581 | 21.789813 | -                                               | <i>Dactylorhiza maculata</i>                                         | <i>Dactylorhiza maculata</i>                                 |
| 28 | BBGK-1-18,6097 -28  | Mountain areas of Kozani, West Macedonia, Greece | June 2018 | 40.300581 | 21.789813 | <i>Dactylorhiza sambucina</i>                   | -                                                                    | <i>Dactylorhiza sambucina</i>                                |

|    |                        |                                                                                               |                   |           |           |                                         |                                                                                 |                                                           |
|----|------------------------|-----------------------------------------------------------------------------------------------|-------------------|-----------|-----------|-----------------------------------------|---------------------------------------------------------------------------------|-----------------------------------------------------------|
|    |                        | Macedonia,<br>Greece                                                                          |                   |           |           |                                         |                                                                                 |                                                           |
| 29 | BBGK-1-<br>18,6097 -29 | Mountain areas<br>of Kozani, West<br>Macedonia,<br>Greece                                     | June 2018         | 40.300581 | 21.789813 | -                                       | <i>Dactylorhiza</i> sp.<br>( <i>D. maculata</i> / <i>D.</i><br><i>viridis</i> ) | <i>Dactylorhiza</i><br><i>maculata</i>                    |
| 30 | BBGK-1-<br>18,6097 -30 | Mountain areas<br>of Kozani, West<br>Macedonia,<br>Greece                                     | June 2018         | 40.300581 | 21.789813 | <i>Dactylorhiza</i> sp.                 | <i>Dactylorhiza</i> sp.                                                         | <i>Dactylorhiza</i> sp.                                   |
| 31 | BBGK-1-<br>18,6097 -32 | Mountain areas<br>of Kozani, West<br>Macedonia,<br>Greece                                     | June 2018         | 40.300581 | 21.789813 | <i>Dactylorhiza</i> sp.                 | <i>Dactylorhiza</i> sp.                                                         | <i>Dactylorhiza</i> sp.                                   |
| 32 | BBGK-1-<br>18,6097-34  | Mountain areas<br>of Kozani, West<br>Macedonia,<br>Greece                                     | June 2018         | 40.300581 | 21.789813 | <i>Dactylorhiza</i> sp.                 | <i>Dactylorhiza</i> sp.<br>( <i>D. viridis</i> )                                | <i>Dactylorhiza</i> sp.                                   |
| 33 | BBGK-1-<br>18,6097-35  | Mountain areas<br>of Kozani, West<br>Macedonia,<br>Greece                                     | June 2018         | 40.300581 | 21.789813 | -                                       | <i>Dactylorhiza</i> sp.<br>( <i>D. viridis</i> )                                | <i>Dactylorhiza</i> sp.                                   |
| 34 | BBGK-1-<br>18,6097-38  | Mountain areas<br>of Kozani, West<br>Macedonia,<br>Greece                                     | June 2018         | 40.300581 | 21.789813 | -                                       | <i>Dactylorhiza</i> sp.<br>( <i>D. viridis</i> )                                | <i>Dactylorhiza</i> sp.                                   |
| 35 | BBGK-1-<br>19,402      | Republic of<br>North<br>Macedonia                                                             | September<br>2019 | 41.99646  | 21.43141  | <i>Anacamptis</i><br><i>pyramidalis</i> | <i>Anacamptis</i><br><i>pyramidalis</i>                                         | <i>Anacamptis</i><br><i>pyramidalis</i>                   |
| 36 | BBGK-1-<br>20,518      | Kastoria, Greece                                                                              | July 2020         | 40.520744 | 21.271206 | -                                       | <i>Dactylorhiza</i> sp.<br>( <i>D. viridis</i> )                                | <i>Dactylorhiza</i> sp.                                   |
| 37 | BBGK-1-<br>20,519      | Kastoria, Greece                                                                              | July 2020         | 40.520744 | 21.271206 | -                                       | <i>Anacamptis</i> sp.<br>( <i>A. morio</i> )                                    | <i>Anacamptis</i> sp.                                     |
| 38 | BBGK-1-<br>21,113      | Grevena<br>Vasilitsa, Mt<br>Lygkos, Annitsa<br>monument,<br>Dotsiko to<br>Samarina,<br>Greece | June 2021         | 39.9      | 21.1167   | <i>Dactylorhiza</i><br><i>sambucina</i> | <i>Dactylorhiza</i> sp.<br>( <i>D. sambucina</i> )                              | <i>Dactylorhiza</i> sp. ( <i>D.</i><br><i>sambucina</i> ) |

|    |                   |                                                       |           |            |           |                                                                              |                                                                                                           |                                                                       |
|----|-------------------|-------------------------------------------------------|-----------|------------|-----------|------------------------------------------------------------------------------|-----------------------------------------------------------------------------------------------------------|-----------------------------------------------------------------------|
| 39 | BBGK-1-<br>21,119 | Fokida Tristeno,<br>Greece                            | June 2021 | 38.606773  | 22.054661 | <i>Dactylorhiza<br/>maculata</i> subsp.<br><i>saccifera</i>                  | <i>Dactylorhiza</i> sp.<br>( <i>D. maculata</i><br>subsp. <i>fuchsii</i> / <i>D.</i><br><i>maculata</i> ) | <i>Dactylorhiza</i><br><i>maculata</i> subsp.<br><i>saccifera</i>     |
| 40 | BBGK-1-<br>21,146 | Mt Ambelos,<br>Samos, South<br>Aegean, Greece         | June 2021 | 37.7994073 | 26.799683 | <i>Dactylorhiza</i><br><i>majalis</i> subsp.<br><i>pythagorae</i>            | <i>Dactylorhiza</i> sp.                                                                                   | <i>Dactylorhiza majalis</i><br>subsp. <i>pythagorae</i>               |
| 41 | BBGK-1-<br>21,236 | Smolikas,<br>Ioannina, Greece                         | July 2021 | 40.0916663 | 20.921663 | <i>Dactylorhiza</i> sp.                                                      | <i>Dactylorhiza</i> sp.<br>( <i>D. maculata</i><br>subsp. <i>fuchsii</i> / <i>D.</i><br><i>maculata</i> ) | <i>Dactylorhiza</i><br><i>maculata</i> subsp.<br><i>saccifera</i>     |
| 42 | BBGK-1-<br>21,237 | Smolikas,<br>Ioannina, Greece                         | July 2021 | 40.0916663 | 20.921663 | <i>Dactylorhiza</i> sp.<br>( <i>D. maculata</i><br>subsp. <i>saccifera</i> ) |                                                                                                           | <i>Dactylorhiza</i><br><i>maculata</i>                                |
| 43 | BBGK-1-<br>21,238 | Smolikas,<br>Ioannina, Greece                         | July 2021 | 40.0916663 | 20.921663 | <i>Dactylorhiza</i><br><i>maculata</i> subsp.<br><i>saccifera</i>            | <i>Dactylorhiza</i> sp.<br>( <i>D. maculata</i> )                                                         | <i>Dactylorhiza</i><br><i>maculata</i> subsp.<br><i>saccifera</i>     |
| 44 | BBGK-1-<br>21,239 | Smolikas,<br>Ioannina, Greece                         | July 2021 | 40.0916663 | 20.921663 | <i>Orchis</i> sp.                                                            | <i>Orchis</i> sp. ( <i>O.</i><br><i>pallens</i> )                                                         | <i>Orchis pallens</i>                                                 |
| 45 | BBGK-1-<br>21,240 | Smolikas,<br>Ioannina, Greece                         | July 2021 | 40.0916663 | 20.921663 | <i>Orchis</i> sp.                                                            | <i>Orchis</i> sp. ( <i>O.</i><br><i>pallens</i> )                                                         | <i>Orchis pallens</i>                                                 |
| 46 | BBGK-1-<br>21,241 | Smolikas,<br>Ioannina, Greece                         | July 2021 | 40.0916663 | 20.921663 | <i>Orchis</i> sp.                                                            | <i>Orchis</i> sp. ( <i>O.</i><br><i>pallens</i> )                                                         | <i>Orchis pallens</i> .                                               |
| 47 | BBGK-1-<br>21,242 | Smolikas,<br>Ioannina, Greece                         | July 2021 | 40.0916663 | 20.921663 | <i>Orchis</i> sp.                                                            | <i>Orchis</i> sp. ( <i>O.</i><br><i>pallens</i> )                                                         | <i>Orchis pallens</i>                                                 |
| 48 | BBGK-1-<br>21,243 | Smolikas,<br>Ioannina, Greece                         | July 2021 | 40.0916663 | 20.921663 | <i>Orchis</i> sp.                                                            | <i>Orchis</i> sp. ( <i>O.</i><br><i>quadripuncata</i> )                                                   | <i>Orchis</i><br><i>quadripuncata</i>                                 |
| 49 | BBGK-1-<br>21,244 | Smolikas,<br>Ioannina, Greece                         | July 2021 | 40.0916663 | 20.921663 | <i>Orchis</i> sp.                                                            | <i>Orchis</i> sp. ( <i>O.</i><br><i>pallens</i> )                                                         | <i>Orchis pallens</i>                                                 |
| 50 | BBGK-1-<br>22,59  | Grevena, Valia<br>Kalda, West<br>Macedonia,<br>Greece | June 2022 | 39.898260  | 21.141416 | <i>Dactylorhiza</i><br><i>sambucina</i>                                      | <i>Dactylorhiza</i> sp.                                                                                   | <i>Dactylorhiza</i><br><i>sambucina</i>                               |
| 51 | BBGK-1-<br>22,60  | Grevena, Valia<br>Kalda, West<br>Macedonia,<br>Greece | June 2022 | 39.898260  | 21.141416 | <i>Dactylorhiza</i><br><i>maculata</i> subsp.<br><i>saccifera</i>            | <i>Dactylorhiza</i><br><i>maculata</i>                                                                    | <i>Dactylorhiza</i><br><i>maculata</i> subsp.<br><i>saccifera</i>     |
| 52 | BBGK-1-<br>22,61  | Grevena, Valia<br>Kalda, West<br>Macedonia,<br>Greece | June 2022 | 39.898260  | 21.141416 | <i>Himantoglossum</i><br><i>calcaratum</i> subsp.<br><i>rumelicum</i>        | <i>Himantoglossum</i><br>sp.                                                                              | <i>Himantoglossum</i><br><i>calcaratum</i> subsp.<br><i>rumelicum</i> |

|    |                  |                                                       |           |           |           |                                                                   |                                        |                                                                   |
|----|------------------|-------------------------------------------------------|-----------|-----------|-----------|-------------------------------------------------------------------|----------------------------------------|-------------------------------------------------------------------|
| 53 | BBGK-1-<br>22,62 | Grevena, Valia<br>Kalda, West<br>Macedonia,<br>Greece | June 2022 | 39.898260 | 21.141416 | <i>Dactylorhiza</i><br><i>maculata</i> subsp.<br><i>saccifera</i> | <i>Dactylorhiza</i><br><i>maculata</i> | <i>Dactylorhiza</i><br><i>maculata</i> subsp.<br><i>saccifera</i> |
|----|------------------|-------------------------------------------------------|-----------|-----------|-----------|-------------------------------------------------------------------|----------------------------------------|-------------------------------------------------------------------|

5

**Supplementary Table S2.** Percentage identities of BLAST results for the 51 samples used for molecular barcoding indicated with their IPEN (International Plant Exchange Network) accession numbers. Low BLAST similarities appear in red. Asterisks (\*) denote divergent results (different genera). Bold letters in samples 48 to 51 are *rbcL* barcoding marker results.

6

7

8

9

10

| No. | IPEN Accession number | <i>ITS</i> | <i>matK</i> | <i>trnH-psbA</i> or <i>rbcL</i> |
|-----|-----------------------|------------|-------------|---------------------------------|
| 1   | BBGK-1-18,6097 -1     | 98.9       | 99.7        | x                               |
| 2   | BBGK-1-18,6097 -2     | 98.9       | 99.3        | 97.2                            |
| 3   | BBGK-1-18,6097 -3     | x          | 98.5        | 94.7                            |
| 4   | BBGK-1-18,6097 -4     | x          | 97.9        | 93.7* ( <i>Ophrys</i> sp.)      |
| 5   | BBGK-1-18,6097 -5     | x          | 99.0        | 98.2                            |
| 6   | BBGK-1-18,6097 -6     | 99.0       | 98.6        | x                               |
| 7   | BBGK-1-18,6097-7      | 99.6       | x           | 97.0                            |
| 8   | BBGK-1-18,6097 -8     | x          | 98.1        | 96.5                            |
| 9   | BBGK-1-18,6097 -9     | x          | 97.7        | x                               |
| 10  | BBGK-1-18,6097 -10    | 99.9       | 99.5        | 98.1                            |
| 11  | BBGK-1-18,6097 -11    | 97.6       | 98.6        | 98.1                            |
| 12  | BBGK-1-18,6097 -12    | 99.2       | 98.4        | x                               |
| 13  | BBGK-1-18,6097 -13    | 99.0       | 98.0        | 95.3* ( <i>Ophrys</i> sp.)      |
| 14  | BBGK-1-18,6097 -14    | 98.8       | 97.8        | 98.4                            |
| 15  | BBGK-1-18,6097 -15    | x          | x           | 98.1                            |
| 16  | BBGK-1-18,6067 -16    | 98.6       | 97.9        | x                               |
| 17  | BBGK-1-18,6097 -17    | 96.3       | 98.2        | 94.8* ( <i>Ophrys</i> sp.)      |
| 18  | BBGK-1-18,6097 -18    | 99.9       | 99.0        | 98.2                            |
| 19  | BBGK-1-18,6097 -19    | 99.3       | 98.6        | 97.4                            |
| 20  | BBGK-1-18,6097 -20    | x          | 99.7        | 98.3                            |
| 21  | BBGK-1-18,6097 -21    | 98.8       | x           | 95.6                            |
| 22  | BBGK-1-18,6097 -22    | 95.2       | 97.4        | 97.7                            |
| 23  | BBGK-1-18,6097 -23A   | 99.7       | 98.3        | 96.0                            |
| 24  | BBGK-1-18,6097 -23B   | 100.0      | 99.0        | 98.0                            |
| 25  | BBGK-1-18,6097 -24    | 100.0      | 99.7        | 97.2                            |
| 26  | BBGK-1-18,6097 -26    | 98.9       | 99.9        | x                               |
| 27  | BBGK-1-18,6097 -27    | 99.5       | 99.7        | 98.1                            |
| 28  | BBGK-1-18,6097 -29    | 99.1       | 99.0        | x                               |
| 29  | BBGK-1-18,6097 -30    | 97.8       | 99.1        | x                               |

|    |                    |      |      |                              |
|----|--------------------|------|------|------------------------------|
| 30 | BBGK-1-18,6097 -32 | 98.9 | 99.7 | x                            |
| 31 | BBGK-1-18,6097-34  | 99.4 | 98.1 | x                            |
| 32 | BBGK-1-18,6097-35  | 99.0 | 99.2 | x                            |
| 33 | BBGK-1-18,6097-38  | 96.0 | 99.1 | x                            |
| 34 | BBGK-1-19,402      | 98.9 | 98.9 | 93.1* ( <i>Heminium</i> sp.) |
| 35 | BBGK-1-20,518      | 98.5 | 98.6 | x                            |
| 36 | BBGK-1-20,519      | x    | 97.5 | x                            |
| 37 | BBGK-1-21,113      | 99.4 | 98.1 | 97.9                         |
| 38 | BBGK-1-21,119      | 97.5 | 99.9 |                              |
| 39 | BBGK-1-21,146      | 98.2 | x    | x                            |
| 40 | BBGK-1-21,236      | 99.6 | 98.1 | 96.0                         |
| 41 | BBGK-1-21,238      | 98.7 | 99.0 | 93.6                         |
| 42 | BBGK-1-21,239      | 98.8 | 97.2 | 94.5* ( <i>Heminium</i> sp.) |
| 43 | BBGK-1-21,240      | 99.2 | 98.3 | 93.2                         |
| 44 | BBGK-1-21,241      | 97.8 | 96.4 | x                            |
| 45 | BBGK-1-21,242      | 98.3 | 97.9 | 90.6* ( <i>Heminium</i> sp.) |
| 46 | BBGK-1-21,243      | 98.4 | 98.6 | 91.8* ( <i>Heminium</i> sp.) |
| 47 | BBGK-1-21,244      | 98.8 | 98.2 | 91.3* ( <i>Heminium</i> sp.) |
| 48 | BBGK-1-22,59       | x    | 96.7 | x                            |
| 49 | BBGK-1-22,60       | 98.3 | 99.4 | 98.7                         |
| 50 | BBGK-1-22,61       | 97.8 | 97.8 | 99.0                         |
| 51 | BBGK-1-22,62       | 98.5 | 99.1 | x                            |

11

**Supplementary Table S3.** NCBI GenBank-deposited accession numbers for 11 Orchidaceae species.

12

13

| Species                        | NCBI GenBank<br>Accession Number |
|--------------------------------|----------------------------------|
| <i>Gymnadenia orchidis</i>     | MF945491.1                       |
| <i>Gymnadenia</i> sp.          | MF945501.1                       |
| <i>Platanthera chlorantha</i>  | EF612531.1                       |
| <i>Dactylorhiza baltica</i>    | MF945403.1                       |
| <i>Dactylorhiza viridis</i>    | KJ452797.1                       |
| <i>Platanthera sparsiflora</i> | MF945504.1                       |
| <i>Platanthera leptocaulon</i> | KJ452824.1                       |
| <i>Diphyllax contigua</i>      | KJ452845.1                       |

|                              |            |
|------------------------------|------------|
| <i>Diphylax uniformis</i>    | JN696434.1 |
| <i>Orchis quadripunctata</i> | AY368385.1 |
| <i>Orchis mascula</i>        | JN896032.1 |

14

Supplementary Table S4. Sequences of the PCR primers used in the experiments.

15

| Primers Used                                 | Forward Primer         | Reverse Primer          |
|----------------------------------------------|------------------------|-------------------------|
| <i>ITS</i> (Tamura et al., 2021) [45]        | ATGCGATACTTGGTGTGAAT   | GACGCTTCTCCAGACTACAAT   |
| <i>matK</i> (Cuénoud et al., 2002) [47]      | CGATCTATTCATTCAATATTTC | TCTAGCACACGAAAGTCGAAGT  |
| <i>trnH-psbA</i> (Costion et al., 2011) [46] | GTTATGCATGAACGTAATGCTC | CGCGCATGGTGGATTCACAATCC |
| <i>Rbcl</i> (Ismail et al., 2020) [48]       | ATGTCACCACAAACAGAAAC   | TCGCATGTACCTGCAGTAGC    |

References [45, 46, 47, 48] presented herein in the “Supplementary Materials” (Table S4) are cited in the main text

16

17



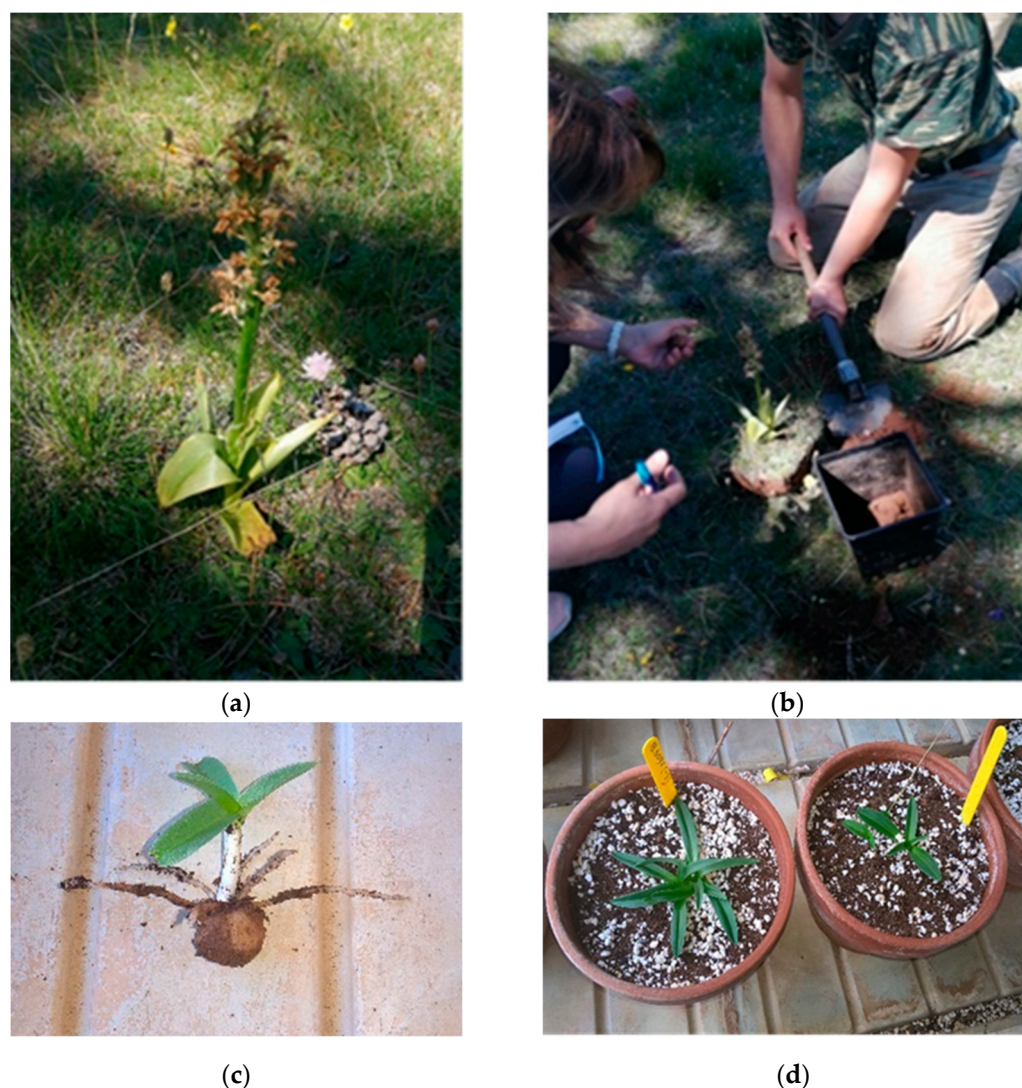

**Supplementary Figure S1.** Collection and handling of wild-growing Greek orchid samples during ex situ conservation at the premises of the Institute of Plant Breeding and Genetic Resources, Agricultural Organization—Demeter (Thermi, metropolitan Thessaloniki, Greece): (a and b) Collection of wild-growing *Orchis* sp. individuals from Mt. Smolikas, northwestern Greece for ex situ conservation; (c) Separation of individual orchid tubers; (d) Potted individual orchid tubers.

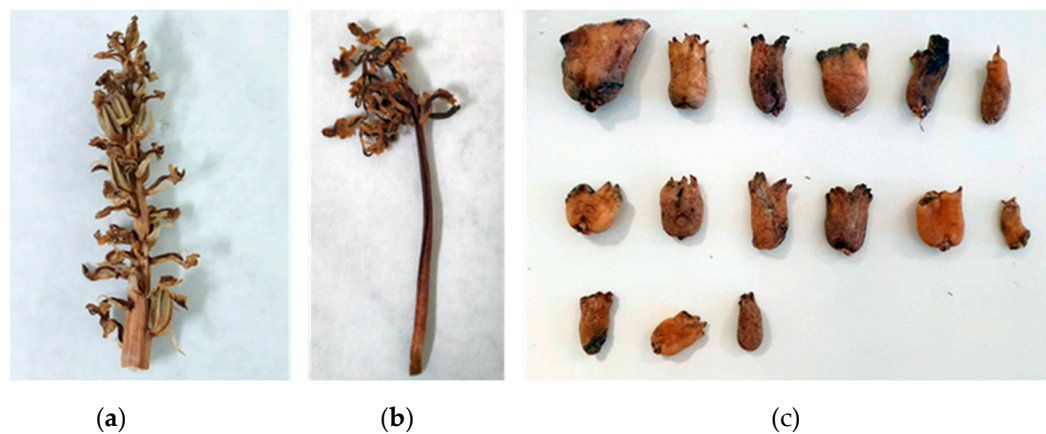

**Supplementary Figure S2.** (a) Dried inflorescences; (b) above-ground parts; and (c) tubers used for DNA extraction.
